# Supplementary figures and images for: Electrical nature of randomly oriented low-dimensional structural hybrids of carbon
Source: Royal Society of Chemistry journal article supplement (doi:10.1039/d4cp00702f), 2024-01-01

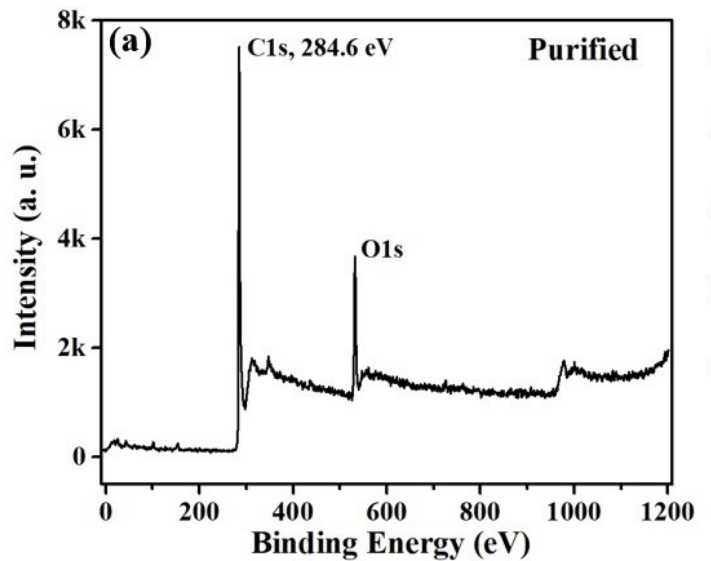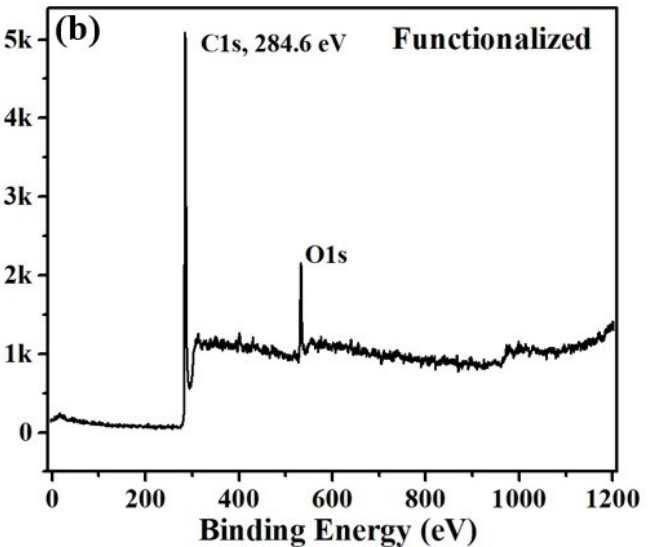

Supplement: d4cp00702f2.pdf [file d4cp00702f2.pdf]

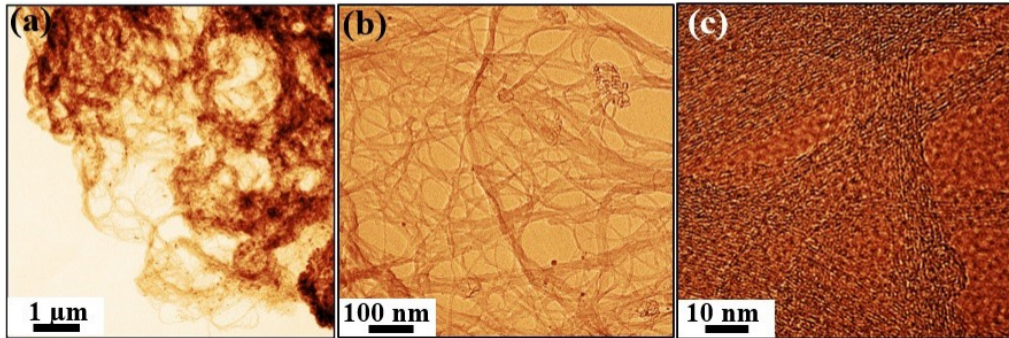

Supplement: d4cp00702f3.pdf [file d4cp00702f3.pdf]
